# Supplementary material
Source: HighWire-hosted journal article supplement (https://jnm.snmjournals.org/highwire/filestream/94468/field_highwire_adjunct_files/0/110114_Supplemental_Data.pdf)
Supplement: 110114_Supplemental_Data.pdf [file 110114_Supplemental_Data.pdf]

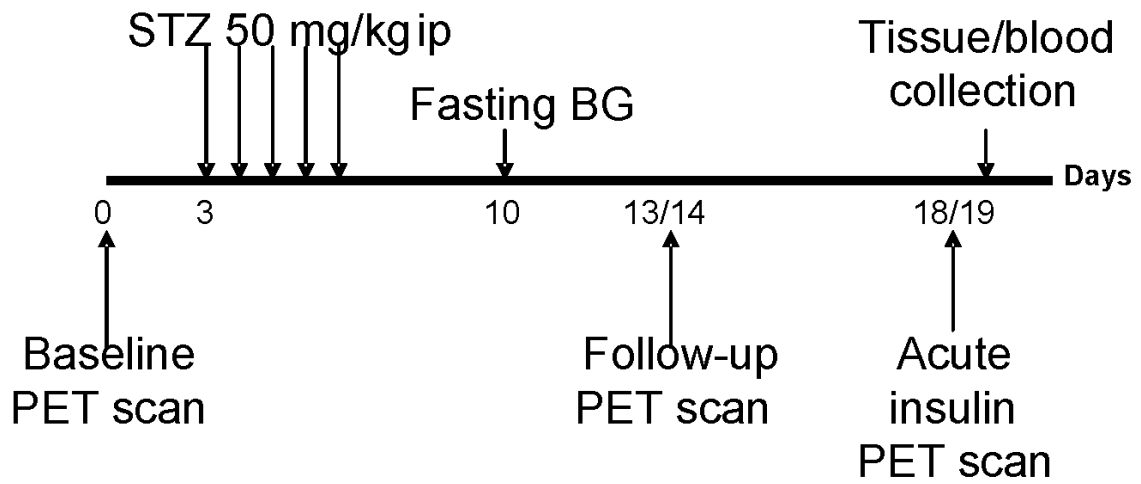

**Supplemental figure 1:** Schematic representation of the type 1 diabetic protocol.

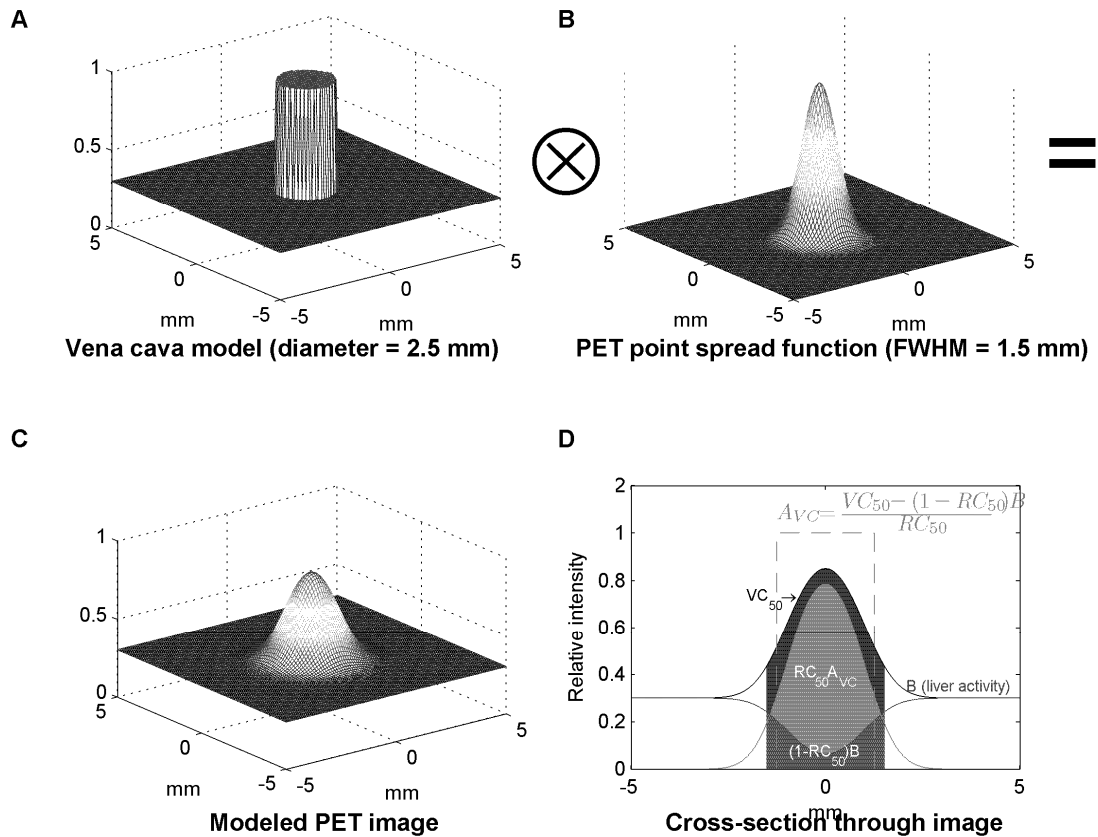

**Supplemental figure 2:** The vena cava recovery coefficient was estimated by modeling the vena cava as a long cylinder with uniform background activity (A) and convolving it with a previously derived PET point spread function (B) to model the PET image of the vena cava (C). The Recovery coefficient, \*RC50\*, was estimated as the integral activity above 50% peak activity in the modeled vena cava, relative to the integral modeled vena cava. As demonstrated in the cross section (D), the activity in a 50% peak activity thresholded ROI, \*VC50\*(black area), can be corrected for background activity spill in (blue area), and then corrected for recovery, \*RC50\*, to obtain the actual activity concentration in the vena cava, \*AVC\*, as shown in equation 1. Background activity, \*B\*, was obtained by sampling the liver activity.
